# Supplementary material for: IR and Raman spectroscopy reveal amino acid–surface interactions on B- and N-doped hydroxylated graphene quantum dots: a DFT study
Source: Royal Society of Chemistry journal article supplement (doi:10.1039/d6ra00110f), 2026-01-01
Supplement: d6ra00110f1.pdf [file d6ra00110f1.pdf]

## Supplementary Information

### IR and Raman Spectroscopy Reveal Amino Acid–Surface Interactions on B- and N-Doped Hydroxylated Graphene Quantum Dots: A DFT Study

Berke Özgür Arslan, Mine Yurtsever\*

#### Detailed Analyses of IR Spectra of the Studied GQDs

1. The change in the IR spectrum of Pristine GQD (G) due to covalent OH functionalization.

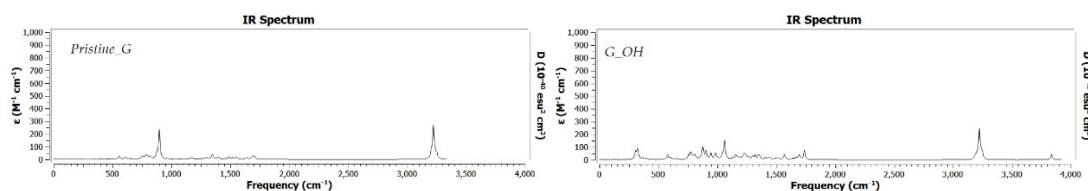

**Figure S1a.** The IR spectra of pristine (G) and OH-functionalized (G-OH) GQD surfaces.

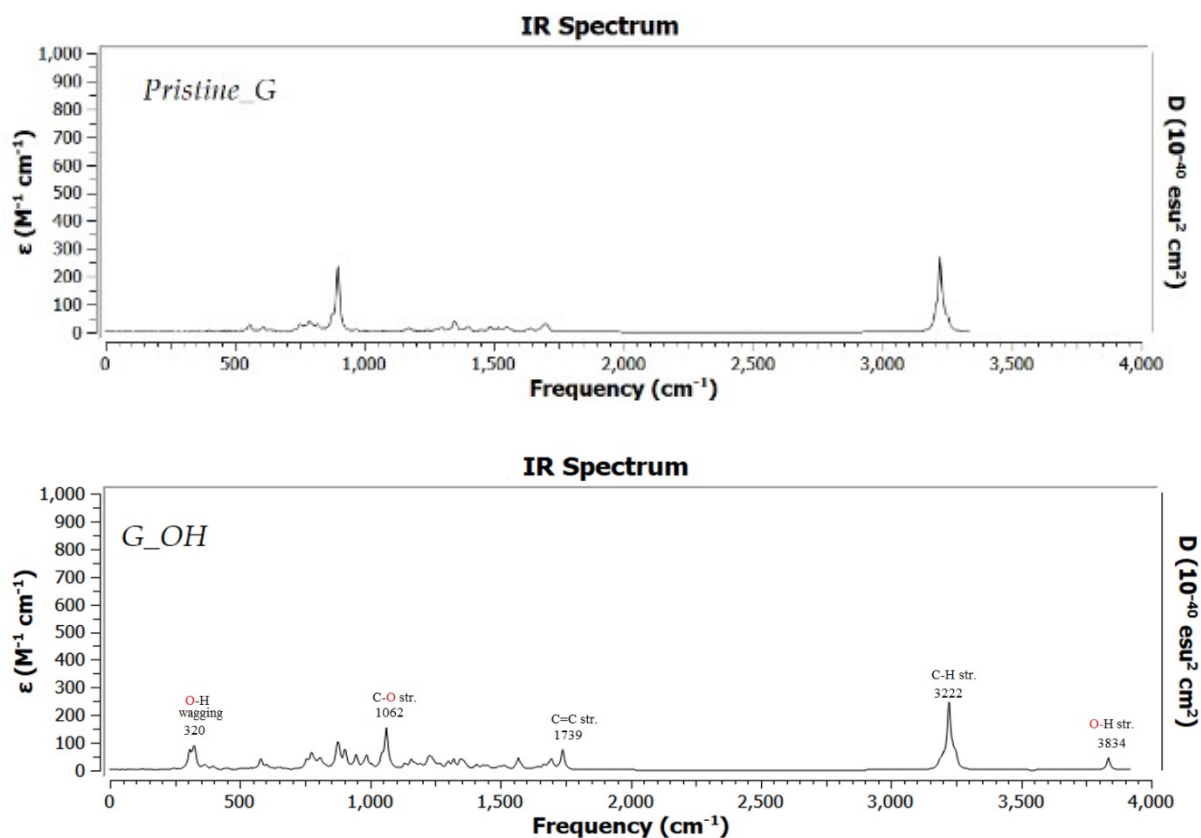

**Figure S1b.** The zoomed-out IR spectra of pristine (G) and OH-functionalized (G-OH) GQD surfaces.

\* Corresponding Author ( mine@itu.edu.tr)

All harmonic vibrational frequencies computed at the M06-2X level are typically scaled by 0.955 to account for systematic anharmonicity and basis set limitations.

In this study, although harmonic frequencies were not explicitly scaled, the comparison with experiment is based on vibrational regions and relative frequency shifts, which are less sensitive to systematic overestimation.

**Table S1.** Detailed IR Comparison (Pristine G vs G-OH)

| Vibrational Region (cm <sup>-1</sup> ) | Pristine GQD (G)        | OH-Functionalized (G-OH)     | Assignment           | Interpretation                                    |
|----------------------------------------|-------------------------|------------------------------|----------------------|---------------------------------------------------|
| 3200–3600 cm <sup>-1</sup>             | Absent                  | Broad strong band            | O–H stretching       | Confirms OH binding. H-bonding broadens the band. |
| 1500–1700 cm <sup>-1</sup>             | Dominant C=C peak       | Shifted C=C + changes        | Aromatic C=C stretch | $\pi$ -system perturbed by OH.                    |
| 1200–1400 cm <sup>-1</sup>             | Moderate peaks          | Enhanced intensity           | C–O stretch          | Formation of C–O bonds at edges/defects.          |
| <1000 cm <sup>-1</sup>                 | Graphene skeletal modes | Additional deformation peaks | C–O–H bending        | New out-of-plane modes due to OH.                 |

## 2. The Dopant Effect on IR Spectra of OH-Functionalized Surfaces

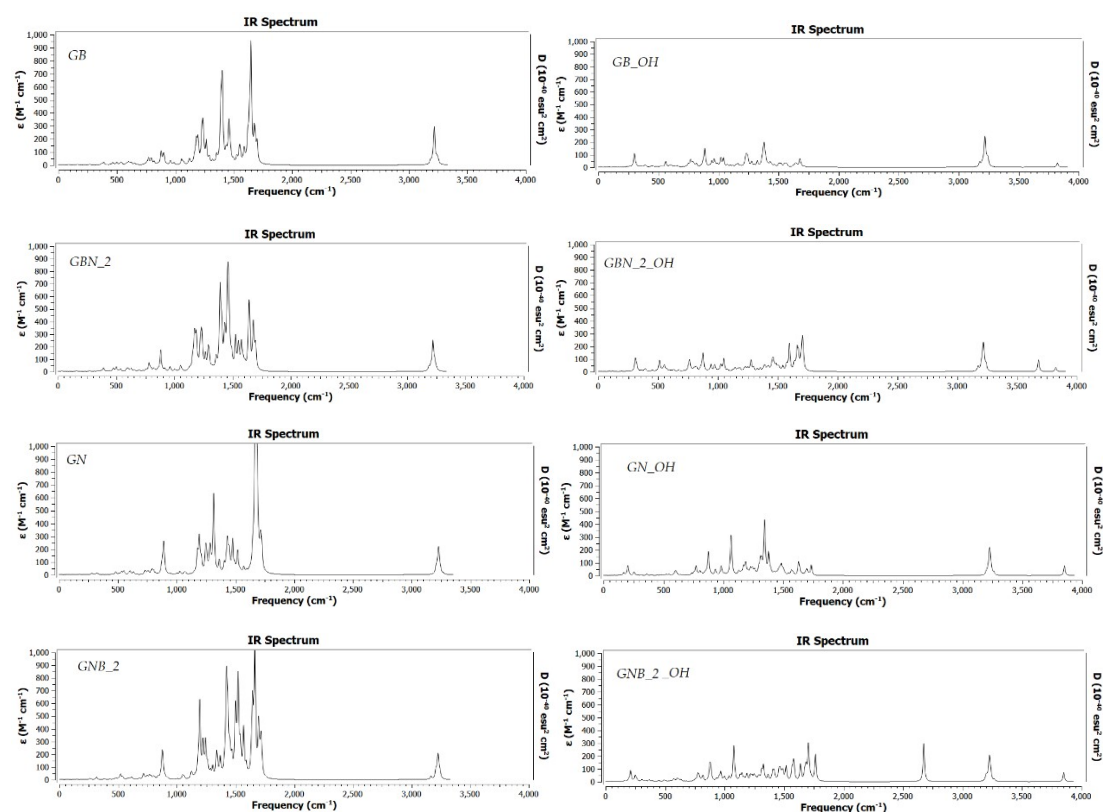

**Figure S2.** The IR spectra of doped and OH-functionalized GQD surfaces.

**Table S2.** Detailed IR Comparison (G-OH vs GNB-OH vs GBN-OH)

| Vibrational Region         | G-OH         | GNB-OH              | GBN-OH                 | Assignment      | Interpretation                                            |
|----------------------------|--------------|---------------------|------------------------|-----------------|-----------------------------------------------------------|
| 3200–3600 cm <sup>-1</sup> | OH stretch   | Shifted OH          | Differently shifted OH | O–H stretching  | Dopant environment modifies OH vibration.                 |
| 1400–1600 cm <sup>-1</sup> | C=C baseline | Lower-shifted peaks | Different shifts       | C=C / C–N / B–N | Dopant positional changes alter electronic structure.     |
| 1100–1300 cm <sup>-1</sup> | C–O, C–C     | New modes           | Different new modes    | B–O & N–O       | The proximity of dopants changes the bonding environment. |

|                           |                |                  |                          |                   |                                                                    |
|---------------------------|----------------|------------------|--------------------------|-------------------|--------------------------------------------------------------------|
| 700–1000 cm <sup>-1</sup> | Graphene modes | Additional peaks | Shifted additional peaks | B–C / N–C bending | The low-frequency region is very sensitive to the dopant position. |
|---------------------------|----------------|------------------|--------------------------|-------------------|--------------------------------------------------------------------|

### 3. The impact of the positions of N and B dopant atoms on the IR spectra of the OH-functionalized surface.

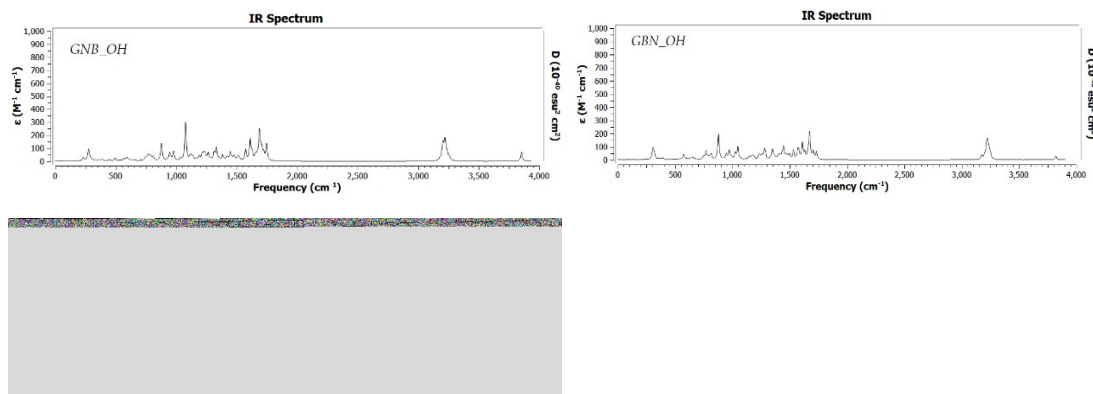

**Figure S3.** Comparison of the IR spectra of the G\_OH, GNB\_OH, and GBN\_OH structures regarding the exchange of the positions of the dopant atoms.

G\_OH displays a stronger, broader O–H stretching band centered around 3200–3500 cm<sup>-1</sup>, indicating a stronger hydrogen bonding. In contrast, the GNB\_OH and GBN\_OH exhibit more intense, structured absorptions in the 1000–1750 cm<sup>-1</sup> fingerprint region, typical of C=O and C–O stretches, consistent with altered substitution at graphitic edges. These differences indicate that N and B-doped G\_OH are more extensively oxygen-functionalized than G\_OH, while G\_OH retains comparatively more free hydroxyl character.

**Table S3. Detailed IR Comparison (G\_OH vs GNB\_OH vs GBN\_OH)**

| Vibrational Region (cm <sup>-1</sup> ) | G_OH                 | GNB_OH                 | GBN_OH                 | Assignment                | Interpretation                                                                                                  |
|----------------------------------------|----------------------|------------------------|------------------------|---------------------------|-----------------------------------------------------------------------------------------------------------------|
| 3200–3600                              | <b>Strong, broad</b> | Medium, broad          | Medium, broad          | O–H stretch               | G_OH shows the largest OH band due to stronger H-bonding.                                                       |
| ~1750–1680                             | Weak                 | <b>More pronounced</b> | <b>More pronounced</b> | C=O stretching            | Stronger high-frequency fingerprint absorptions are consistent with increased carbonyl content caused by doping |
| 1300–1000                              | Moderate             | <b>Stronger</b>        | <b>Stronger</b>        | C–O stretching (phenolic) | GNB/GBN have enhanced intensity due to higher content of C–O functionalities                                    |

#### 4a. Changes in the IR spectrum of glycine upon adsorption onto the OH-functionalized GQD surface.

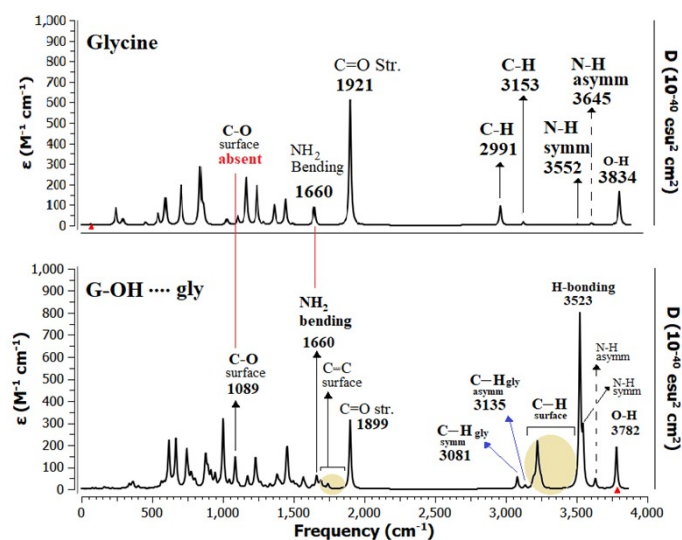

Figure S4a. Comparison of the IR spectra of glycine and OH-functionaized surface adsorbed glycine.

Compared with free glycine, the G–OH···glycine complex shows pronounced red shifts in the C=O and O–H stretching modes, the emergence of surface-specific C–O vibrations, and significant broadening of the N–H stretching region, collectively confirming hydrogen-bond-driven adsorption dominated by the carboxyl group.

Table S4a. Detailed IR Comparison (G–OH vs free Glycine)

| Vibrational Mode        | Free glycine (cm <sup>-1</sup> ) | G–OH···gly (cm <sup>-1</sup> ) | Interpretation                       |
|-------------------------|----------------------------------|--------------------------------|--------------------------------------|
| C=O stretch             | 1921                             | 1899                           | <b>H-bonding</b> , bond weakening    |
| NH <sub>2</sub> bending | 1660                             | 1660                           | no change                            |
| C–O (surface)           | absent                           | 1089                           | <b>Adsorption fingerprint</b>        |
| C–H sym                 | 2991                             | 3081                           | Restricted motion                    |
| C–H asym                | 3153                             | 3135                           | Electronic perturbation              |
| N–H stretch             | 3552–3645                        | broadened                      | H-bond coupling                      |
| O–H stretch             | 3834                             | 3782                           | Red shifted due to surface H-bonding |

#### 4b. The impact of the different Glycine conformations on the IR spectra of the OH-functionalized surface.

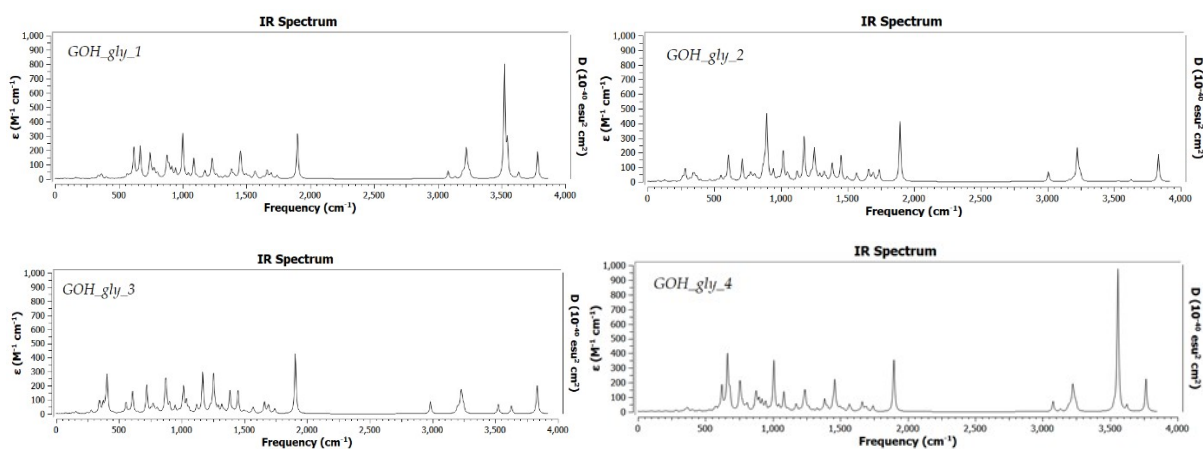

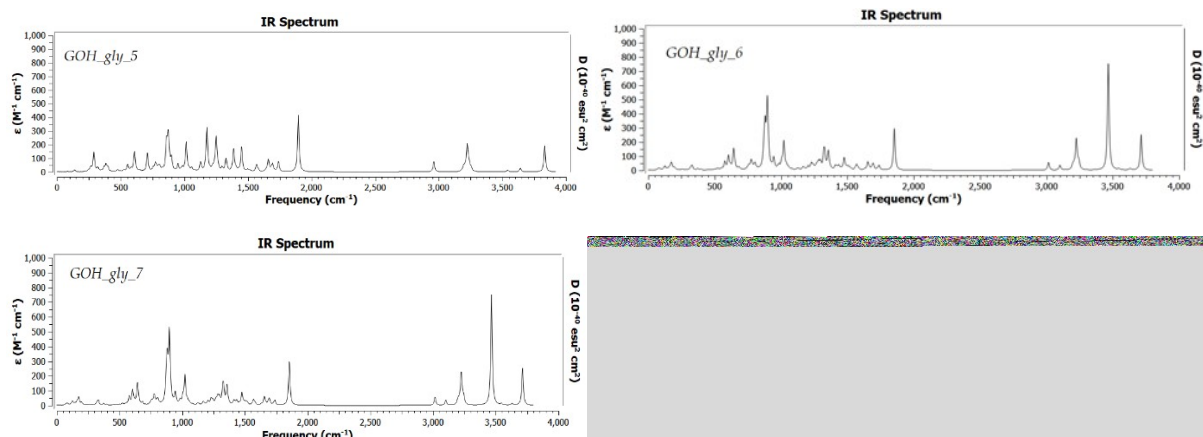

**Figure S4b.** Comparison of the IR spectra of GOH\_gly regarding different conformations (1-7) of glycine on the surface.

**Table S4b. Detailed IR Comparison (GOH\_gly conformers 1–7)**

| Vibrational Region         | Conformer Variability        | Assignment                            | Interpretation                                     |
|----------------------------|------------------------------|---------------------------------------|----------------------------------------------------|
| 3200–3500 cm <sup>-1</sup> | Small N–H stretch shifts     | N–H stretch                           | H-bond strength varies with orientation.           |
| 2800–3000 cm <sup>-1</sup> | Minor intensity changes      | C–H stretch                           | CH <sub>2</sub> orientation is slightly different. |
| 1600–1700 cm <sup>-1</sup> | C=O peak shifts              | C=O stretch                           | Orientation affects C=O–surface interaction.       |
| 1400–1550 cm <sup>-1</sup> | COO <sup>-</sup> modes shift | COO <sup>-</sup> asymmetric/symmetric | Charge delocalization changes per conformation.    |
| 1000–1300 cm <sup>-1</sup> | Intensity variations         | C–N & C–O                             | Sensitive to torsional geometry.                   |
| <900 cm <sup>-1</sup>      | Distinct pattern shifts      | Bending modes                         | Surface binding alters out-of-plane vibrations.    |

Due to non-covalent interactions between the amino acid and the surface, where an H-bond forms with the hydrogen of the OH functional group and the nitrogen atom of glycine, the O-H stretching frequency at 3834 cm<sup>-1</sup> shifts to a lower frequency around 3700-3750 cm<sup>-1</sup> and becomes more prominent. The newly formed high-intensity N-H stretching band in the 3000-3450 cm<sup>-1</sup> region is strongly influenced by the strength of the H-bond between the surface and the adsorbed amino acid, showing orientation-dependent changes.

## 5. Impact of the type of amino acid on the IR spectra of the OH-functionalized surface.

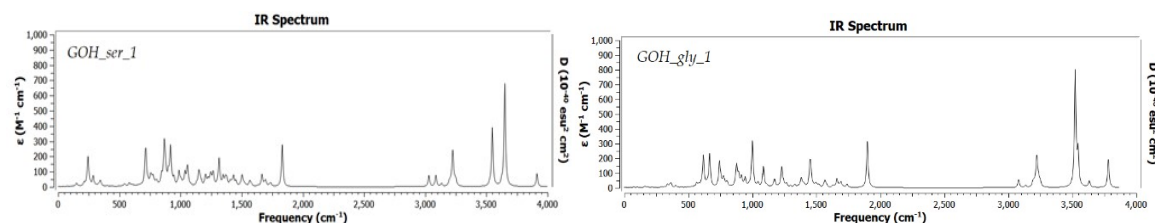

**Figure S5.** Comparison of the IR spectra for GOH\_ser and GOH\_gly.

**Table 5. Detailed IR Comparison (GOH\_gly vs GOH\_ser)**

| Vibrational Region         | GOH_gly                   | GOH_ser                            | Assignment                  | Interpretation                                         |
|----------------------------|---------------------------|------------------------------------|-----------------------------|--------------------------------------------------------|
| 3200–3600 cm <sup>-1</sup> | NH + one OH               | NH + two OH                        | O–H & N–H stretch           | Serine adds extra complexity due to the OH side-chain. |
| 1600–1700 cm <sup>-1</sup> | Single C=O peak           | Shifted & stronger C=O             | C=O stretch                 | Stronger adsorption of serine.                         |
| 1400–1500 cm <sup>-1</sup> | Moderate COO <sup>-</sup> | More intense COO <sup>-</sup>      | COO <sup>-</sup> stretching | Serine interacts more strongly.                        |
| 1100–1300 cm <sup>-1</sup> | C–N / C–O                 | Additional C–O from the side chain | Alcohol C–O, amine C–N      | Side-chain OH introduces new features.                 |
| <1000 cm <sup>-1</sup>     | Simple bending patterns   | More complex modes                 | CH/NH/OH bending            | More flexible serine vibrational coupling.             |

The IR spectra of GOH\_ser and GOH\_gly show the same general features due to their shared graphene oxide backbone, but several characteristic differences arise from the distinct amino acid types. GOH\_ser exhibits a broader O–H/N–H stretching band (3600–3200 cm<sup>−1</sup>) and additional C–O stretching peaks (1200–1050 cm<sup>−1</sup>), consistent with serine’s hydroxyl-containing side chain. In contrast, GOH\_gly lacks a side-chain hydroxyl and shows a sharper N–H/O–H region and weaker C–O bands. Slightly stronger C–H and amide II (1650–1550 cm<sup>−1</sup>) bands in GOH\_ser also reflect the increased surface interactions introduced by serine compared with glycine.

## 6. Comparison of IR Spectra of the Undoped G, G\_OH, and G\_OH\_ser Structure

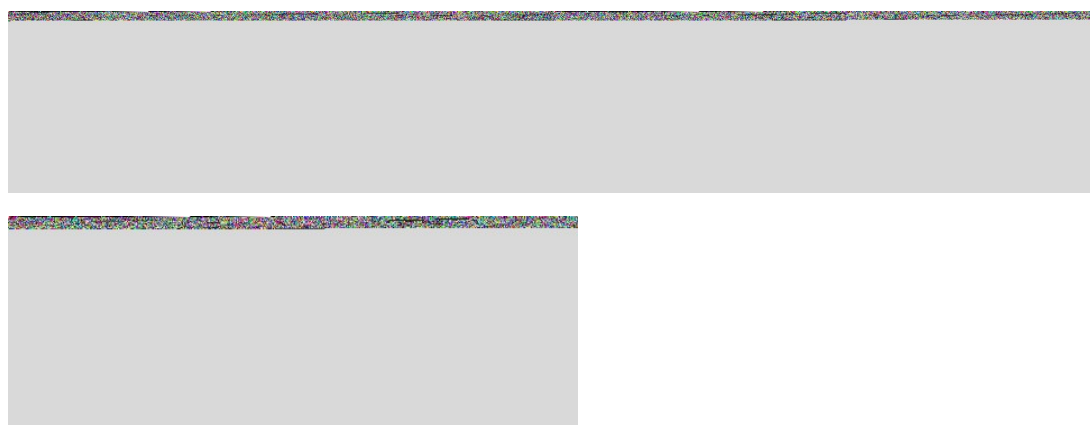

**Figure S6.** Comparison of the IR spectra for G, G\_OH, and GOH-ser

**Table S6. Detailed IR Comparison (G vs G\_OH vs GOH\_ser)**

| Vibrational Region         | G                     | G_OH        | GOH_ser              | Assignment         | Interpretation                                 |
|----------------------------|-----------------------|-------------|----------------------|--------------------|------------------------------------------------|
| 3200–3600 cm <sup>−1</sup> | Absent                | O–H band    | O–H + N–H bands      | O–H, N–H stretches | Serine introduces additional NH & OH features. |
| 1500–1700 cm <sup>−1</sup> | C=C peaks             | Shifted C=C | Extra strong peaks   | C=O, C=N, C=C      | Serine C=O creates new modes.                  |
| 1100–1400 cm <sup>−1</sup> | Graphene baseline     | C–O modes   | More complex C–O/C–N | C–O, C–N           | Serine binding is evident.                     |
| <1000 cm <sup>−1</sup>     | Pure graphene bending | OH bending  | Many new bends       | NH/OH/CH bending   | Strong serine–surface coupling.                |

## 7. Comparison of IR spectra of the GB and GB\_OH structures

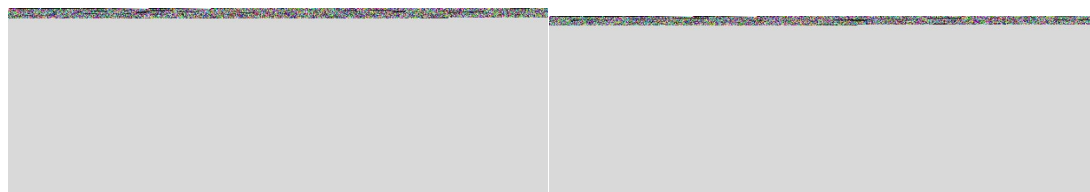

**Figure S7.** Comparison of the IR spectra for GB, GB\_OH

**Table S7. Detailed IR Comparison (GB vs GB\_OH)**

| Vibrational Region( $\text{cm}^{-1}$ )       | GB (B-Doped GQD)                     | GB_OH (Hydroxylated B-Doped GQD)                          | Interpretation                                                                                             |
|----------------------------------------------|--------------------------------------|-----------------------------------------------------------|------------------------------------------------------------------------------------------------------------|
| O–H stretching (3200–3600)                   | Absent                               | Strong broad band at ~3500–3600                           | Confirms addition of surface –OH groups; stronger hydrogen-bonding environment                             |
| C–H stretching (2800–3100)                   | Very weak                            | Unchanged                                                 | Indicates minimal $\text{sp}^3$ -C formation; hydroxylation does not significantly introduce aliphatic C–H |
| C=C ( $\text{sp}^2$ ) stretching (1500–1650) | Strong, sharp peaks around 1500–1600 | Peaks are still present but slightly reduced in intensity | Hydroxylation disturbs $\pi$ -conjugation; partial loss of aromatic character near functionalized sites    |
| C–O stretching (1000–1300)                   | Weak                                 | Stronger, more defined peaks around 1000–1200             | Direct evidence of surface C–O bond formation following hydroxylation                                      |
| Fingerprint region (600–1000)                | Clear, structured                    | Broader, less intense                                     | Structural disorder increases upon hydroxylation                                                           |
| Overall intensity                            | Higher intensity near 1500–1700      | More distributed intensities with a dominant O–H band     | Indicates reorganization of electron density; surface becomes more polar                                   |

Both spectra show the same underlying graphitic/aromatic backbone (clear mid-IR structure in the fingerprint and weak C–H stretches), but GB has very strong, sharp absorptions in the  $\sim 1200\text{--}1700\text{ cm}^{-1}$  region while GB\_OH shows those bands strongly reduced and a broader O–H / O–H-related envelope in the  $3200\text{--}3600\text{ cm}^{-1}$  region plus relatively stronger C–O features in the  $1200\text{--}1000\text{ cm}^{-1}$  range. This pattern indicates that GB is more conjugated, whereas GB\_OH is more oxygenated, with increased surface hydroxyl (and C–O) functionality, and the sharp conjugated modes weaken.

## 8. The Definition of the dopant positions

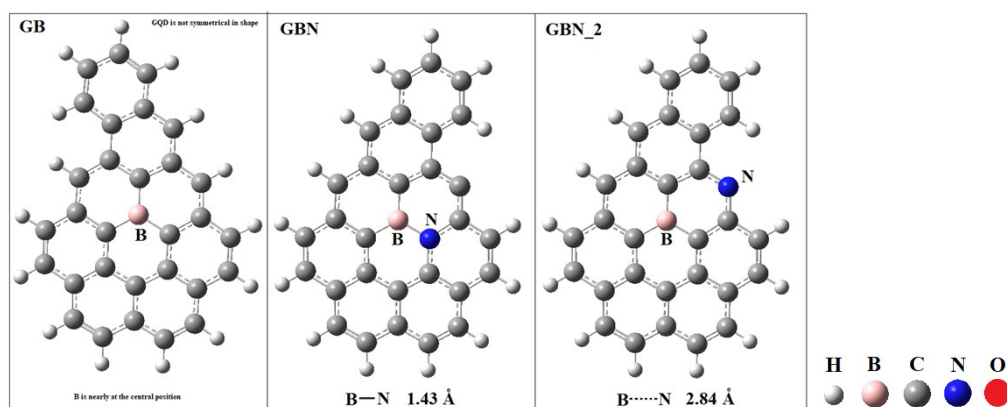

**Figure S8.** The lattice positions of the dopant atoms.

The relative positions of the dopant atoms govern the local charge distribution within the graphene quantum dots and are directly reflected in the vibrational response. In the GB structure, central boron substitution introduces a localized electron deficiency in the  $\pi$ -framework, weakening adjacent C–C bonds and leading to red shifts in graphene-derived

stretching modes with enhanced IR intensities. When boron and nitrogen are placed adjacently in GBN ( $B-N = 1.43 \text{ \AA}$ ), donor–acceptor charge compensation between N and B partially restores local  $\pi$ -electron density, resulting in smaller frequency shifts of the C–C modes and the appearance of dopant-associated vibrational features with increased polarity-driven IR activity. In contrast, spatially separated dopants in GBN\_2 ( $B \cdots N = 2.84 \text{ \AA}$ ) act as independent perturbation centers, producing a more heterogeneous charge distribution that manifests as broader shifts and splitting of C–C and C–O bands and more pronounced changes in Raman intensities. These trends demonstrate that dopant proximity controls charge localization and polarization, thereby dictating the observed IR and Raman spectral signatures.
